# Supplementary material
Source: PubMed Central journal article supplement (PMC9170967)
Supplement: mmc5.pdf [file mmc5.pdf]

Community-3

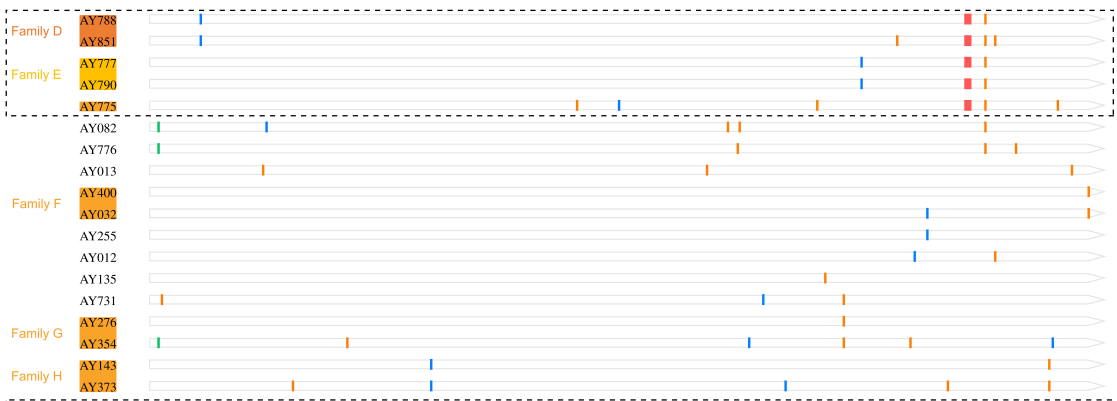

Community-1

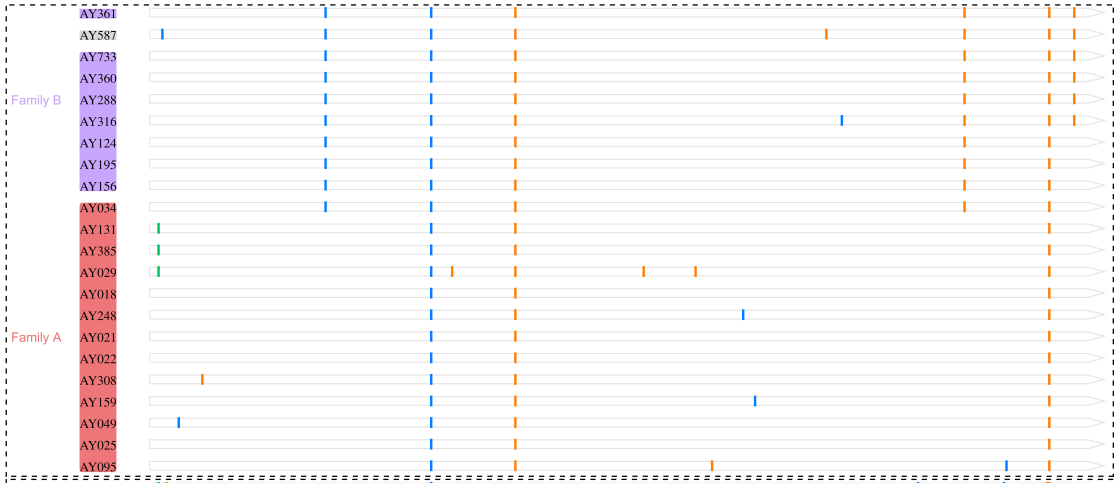

Community-2

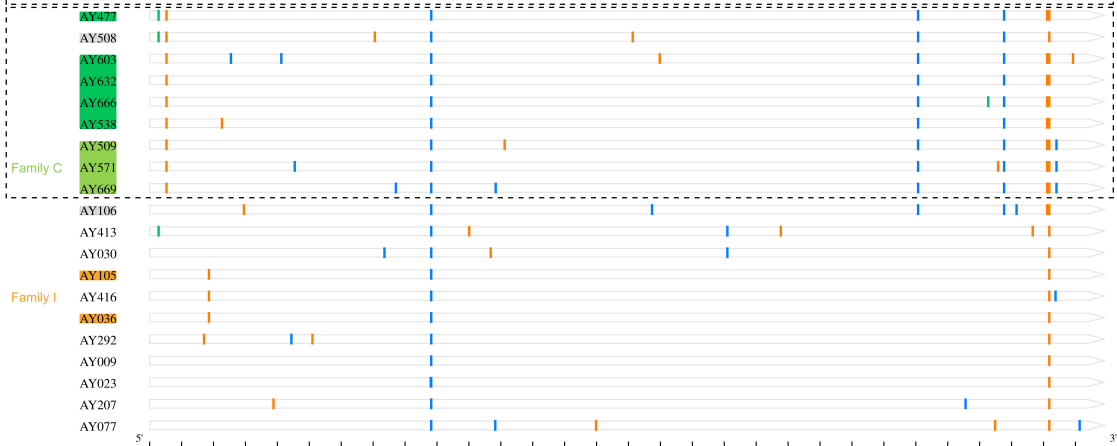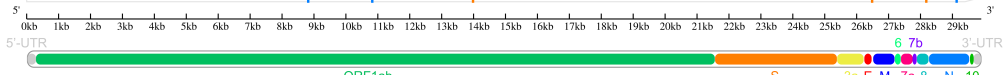

Community-1

T5473C C8782T T11418C C25490T T28144C C28926T

Community-2

T490A C8782T C24034T T26729C G28077C T28144C C28369T

Community-3

T1564C C22264T 25518delT 25532delT 25533delT G26144T
